# Supplementary material
Source: PubMed Central journal article supplement (PMC8373211)
Supplement: jcm.00859-21-s0001.pdf [file jcm.00859-21-s0001.pdf]

## 1 **Supplemental Methods:**

2

### 3 *Assay Design*

4 We used synthetic whole-genome RNA fragments as a wild-type control (Twist Bioscience, San Francisco, CA,  
5 USA) diluted to  $10^4$  copies/ $\mu$ L in Tris-EDTA buffer (10 mM Tris, 1 mM EDTA). Due to manufacturing restrictions  
6 for SARS-CoV-2-specific dsDNA gene fragments, we pooled six individual ssDNA mutant amplicons (Elim  
7 Biopharmaceuticals, Hayward, CA, USA) in equimolar ratios diluted to  $10^4$  copies/ $\mu$ L each in Tris-EDTA buffer (10  
8 mM Tris, 1 mM EDTA) (Table S2). The two primer sets and three mutant probes used in this assay amplify two of  
9 these six amplicons, while the other four were added for other candidate assays. Primers and dual-labeled BHQ-  
10 quenched hydrolysis probes were ordered from the Stanford Protein and Nucleic Acid Facility (Table S1),  
11 rehydrated to 100 $\mu$ M in Tris-EDTA buffer, and mixed to create bulk primer/probe mix.

12

13 Primer/probe mix (1  $\mu$ L) was combined with a one-step RT-qPCR system (12.5  $\mu$ L master mix + 0.5  $\mu$ L *Taq*  
14 polymerase, SuperScript™ III Platinum™ One-Step qRT-PCR Kit, Invitrogen, Carlsbad), nuclease-free water (6.0  
15  $\mu$ L), and template (5.0  $\mu$ L) in a 25 $\mu$ L reaction (Table S3). All experiments were conducted on a BioRad CFX96  
16 real-time PCR instrument in 96-well plates (BioRad, Hercules, CA, USA). One mutant control (pooled ssDNA  
17 mutant amplicons) and one wild-type control (Twist whole-genome synthetic RNA) were included in each RT-  
18 qPCR experiment. Cycling conditions were: 52°C for 15:00, 94°C for 2:00, and then 45 cycles of 94°C for 00:15,  
19 57.0°C for 00:40, and 68°C for 00:20. Annealing temperature was optimized with a temperature gradient.

20

21 Fluorescence was collected in all channels (1, N501Y-FAM; 2, L452R-HEX; 3, N501-Cy3.5 (ROX); 4, E484K-Cy5;  
22 5, no probe). Fixed fluorescence thresholds of 500 relative fluorescence units ([RFU], N501Y-FAM), 1000 RFU  
23 (L452R-HEX), 50 RFU (N501-Cy3.5), and 200 RFU (E484K-Cy5) were used to determine the threshold cycle ( $C_t$ ).  
24 Assay interpretation is described in detail in Table S4.

25

### 26 *Analytical Performance*

27 To determine the lower limit of detection (LLOD), the pool of six mutant ssDNA oligonucleotides described above  
28 was diluted to 100 copies/ $\mu$ L template, 10 copies/ $\mu$ L, 5 copies/ $\mu$ L, and 1 copies/ $\mu$ L in Tris-EDTA buffer in

29 replicates of 20. Any amplification crossing the fluorescence threshold (Table S4) was regarded as detection. The  
30 95% LLOD was determined by fitting these data to a probit regression curve. The respective 95% LLODs for the  
31 L452R, E484K, and N501Y targets were 1.5 (95% CI 1.0-3.1), 16.0 (11.1-40.3), and 23.6 (14.0-29.4) copies/ $\mu$ L  
32 template (Table S5). Assay linearity was assessed from 0.0 to 6.0 log<sub>10</sub> copies/ $\mu$ L template (Table S6). We  
33 observed no non-specific N501 wild-type (Cy3.5) amplification even at high (10<sup>6</sup> copies/ $\mu$ L) mutant ssDNA copy  
34 number; similarly, we observed no non-specific L452R, E484K, or N501Y non-specific amplification at high (10<sup>6</sup>  
35 copies/ $\mu$ L) wild-type TWIST synthetic RNA copy number (Table S6). Precision was not assessed for this  
36 qualitative assay.

37

### 38 *Next-Generation Sequencing Validation*

39 A subset of wild-type and mutant specimens genotyped by RT-qPCR were assessed by WGS in a validation  
40 dataset. Specimens selected for sequencing met one of several selection criteria: 1. Randomly-selected  
41 specimens with original SARS-CoV-2 RT-qPCR diagnostic Ct value  $\leq$ 30. 2. Specimens from patients with specific  
42 clinical histories triaged for sequencing by the virology medical director. These included patients with suspected  
43 COVID-19 re-infection, post-vaccination COVID-19 infection, or COVID-19 infection after travel from regions with  
44 prevalent variants of interest/concern.3. Specimens with sufficient residual material and viral load (Ct  $\leq$ 30) with  
45 screen-detected L452R, E484K, or N501Y mutations by variant genotyping RT-qPCR.

46

47 We adapted an existing WGS pipeline for poliovirus genotyping to conduct SARS-CoV-2 whole-genome  
48 amplicon-based sequencing.(1–3) For target enrichment, we designed 28 primersets to generate 28 overlapping  
49 amplicons of approximately 1,200 nucleotides each using PrimalSeq.(2) Even- and odd-numbered primersets  
50 were pooled separately, and then the whole genome was amplified in two reactions via long-range PCR using 10  
51  $\mu$ L New England BioLabs (NEB) Luna 2X buffer, 1  $\mu$ L NEB enzyme mix, 2  $\mu$ L nuclease-free water, 2  $\mu$ L primer  
52 pool (50nM each primer), and 5  $\mu$ L extracted nucleic acid. Long-range PCR conditions were: 52°C for 30:00,  
53 94°C for 2:00, and then 40 cycles of 94°C for 00:15, 55.0°C for 00:30, and 68°C for 02:00 prior to final 68°C  
54 extension for 10:00.

55

56 Libraries were prepared using NEBNext library preparation reagents for Illumina sequencing instruments (New  
57 England BioLabs, Ipswich, MA). Products from the two long-range PCR reactions (40  $\mu$ L) were pooled and  
58 purified with 36  $\mu$ L (0.9X ratio) AMPure XP beads (Beckman Coulter, Brea, CA) and 80% ethanol, then  
59 resuspended into 32  $\mu$ L AVE elution buffer. Purified cDNA was quantified using the Qubit dsDNA broad range  
60 assay. Libraries were then fragmented at 37°C for 30:00 using 2  $\mu$ L 10X fragmentation buffer, 1  $\mu$ L 200mM  
61 MgCl<sub>2</sub>, 2  $\mu$ L fragmentase, and 15  $\mu$ L purified cDNA from long-range PCR.

62  
63 Fragmented libraries (20  $\mu$ L) were then purified with 36  $\mu$ L (1.8X ratio) AMPure XP beads and 80% ethanol, then  
64 resuspended into 32  $\mu$ L AVE elution buffer. Purified fragmented cDNA (30  $\mu$ L) was subject to end-repair/dA tailing  
65 using 1.5  $\mu$ L NEB end-repair enzyme mix and 3.5  $\mu$ L end-repair reaction buffer (20°C for 30:00, 65°C for 30:00).  
66 We ligated single-index NEBNext adapters according to manufacturer recommendations in a 45  $\mu$ L reaction  
67 containing 35  $\mu$ L end-repaired product. This product was again purified with 0.9X AMPure XP beads and 80%  
68 ethanol, then resuspended in 28  $\mu$ L buffer.

69  
70 We indexed libraries using NEB single index primers in a 50  $\mu$ L reaction containing 25  $\mu$ L NEBNext high-fidelity  
71 2X master mix, 1  $\mu$ L universal primer, 1  $\mu$ L index primer, and 23  $\mu$ L adapter-ligated cDNA. Thermocycler settings  
72 for indexing were: 94°C for 00:30, then 12 cycles of 94°C for 00:10, 65.0°C for 00:30, and 72°C for 00:30.  
73 Indexed libraries were then purified with 18  $\mu$ L (0.9X ratio) AMPure XP beads and 80% ethanol, then  
74 resuspended into 32  $\mu$ L AVE elution buffer.

75  
76 Indexed library fragment size and concentration were measured with a BioAnalyzer 2100, then diluted to 15pM.  
77 Each sequencing run contained one no template control, one wild-type TWIST synthetic whole-genome RNA  
78 control, and up to 46 clinical specimens. Libraries were sequenced on an Illumina MiSeq using single-end 150-  
79 cycle sequencing using the MiSeq reagent kit V3.

80  
81 Genomes were assembled via a custom assembly and bioinformatics pipeline using NCBI NC\_045512.2 as  
82 reference. Whole-genome sequences with at least 90% genome coverage to a depth of at least 10 reads were

83 accepted for interpretation. Mutation calling required a depth of at least 12 reads with a minimum variant  
84 frequency of 20%. Lineage name was assigned using PANGOLIN.(3)

85

#### 86 *Clinical Specimen NAAT Platforms*

87 Prior to genotyping RT-qPCR, initial respiratory SARS-CoV-2 NAAT was conducted on a variety of platforms  
88 (Table 1).(4–6) These included: 1) a previously-described laboratory-developed reverse transcription quantitative  
89 polymerase chain reaction (RT-qPCR) targeting the envelope gene (*E* gene) on the Rotor-Gene Q (Qiagen,  
90 Germantown, MD)(4–6); 2) a laboratory-developed RT-qPCR assay utilizing a PerkinElmer kit targeting the  
91 ORF1ab and nucleocapsid gene ([*N* gene] PerkinElmer, San Jose, CA); 3) Panther Fusion SARS-CoV-2 (Hologic,  
92 Marlborough, MA), a high-throughput RT-qPCR method targeting open reading frame 1ab (ORF1ab); 4) Aptima  
93 SARS-CoV2 (Panther System, Hologic), a transcription mediated amplification method targeting ORF1ab; 5)  
94 GeneXpert Xpress SARS-CoV-2 (Cepheid, Sunnyvale, CA), a rapid RT-qPCR method targeting both *E* and *N*  
95 genes; 6) cobas Liat SARS-CoV-2 & Influenza A/B (Roche, Indianapolis, IN), a point-of-care RT-PCR method  
96 targeting ORF1ab and *N* gene; 7) e-Plex SARS-CoV-2 (Genmark, Carlsbad, CA), a rapid RT-PCR method  
97 targeting the *N* gene. All specimens testing positive for SARS-CoV-2 by NAAT with RT-qPCR  $C_t \leq 30$  or  
98 transcription-mediated amplification relative light units (RLU)  $\geq 1,100$  during this period were subject to multiplex  
99 allele-specific genotyping RT-qPCR. The small subset (288/4,049, 7.1%) of included specimens tested by rapid  
100 NAATs (Cepheid GeneXpert, Roche Liat, Genmark Eplex) did not have  $C_t$  values available and were included  
101 irrespective of viral load. All assays were conducted according to manufacturer and emergency authorization  
102 instructions.(7, 8)

103

#### 104 *Nucleic Acid Extraction*

105 Because residual eluate is not available for specimens originally tested on the Hologic or rapid NAAT (Cepheid  
106 GeneXpert, Roche Liat, Genmark Eplex) platforms, we re-extracted these genotyped samples from the original  
107 respiratory swab specimens on the same platform, provided there was sufficient material. Total nucleic acids were  
108 extracted from 300  $\mu$ L viral transport media, universal transport media, or phosphate-buffered saline and eluted  
109 into 60  $\mu$ L elution buffer (PerkinElmer Janus G3 Reformatter, Chemagic 360 nucleic acid extractor, and Chemagic  
110 Viral DNA/RNA 300 Kit).

111 All other specimens were genotyped from the residual diagnostic eluate.

112

113 **Supplemental References:**

- 114 1. Sahoo MK, Holubar M, Huang C, Mohamed-Hadley A, Liu Y, Waggoner JJ, Troy SB, Garcia-Garcia L,  
115 Ferreyra-Reyes L, Maldonado Y, Pinsky BA. 2017. Detection of Emerging Vaccine-Related Polioviruses by  
116 Deep Sequencing. *J Clin Microbiol* 55:2162–2171.
- 117 2. Quick J, Grubaugh ND, Pullan ST, Claro IM, Smith AD, Gangavarapu K, Oliveira G, Robles-Sikisaka R,  
118 Rogers TF, Beutler NA, Burton DR, Lewis-Ximenez LL, de Jesus JG, Giovanetti M, Hill SC, Black A, Bedford  
119 T, Carroll MW, Nunes M, Alcantara LC, Sabino EC, Baylis SA, Faria NR, Loose M, Simpson JT, Pybus OG,  
120 Andersen KG, Loman NJ. 2017. Multiplex PCR method for MinION and Illumina sequencing of Zika and other  
121 virus genomes directly from clinical samples. *Nat Protoc* 12:1261–1276.
- 122 3. Rambaut A, Holmes EC, O’Toole Á, Hill V, McCrone JT, Ruis C, du Plessis L, Pybus OG. 2020. A dynamic  
123 nomenclature proposal for SARS-CoV-2 lineages to assist genomic epidemiology. *Nat Microbiol* 5:1403–  
124 1407.
- 125 4. Corman VM, Landt O, Kaiser M, Molenkamp R, Meijer A, Chu DK, Bleicker T, Brünink S, Schneider J,  
126 Schmidt ML, Mulders DG, Haagmans BL, van der Veer B, van den Brink S, Wijsman L, Goderski G, Romette  
127 J-L, Ellis J, Zambon M, Peiris M, Goossens H, Reusken C, Koopmans MP, Drosten C. 2020. Detection of  
128 2019 novel coronavirus (2019-nCoV) by real-time RT-PCR. *Eurosurveillance* 25.
- 129 5. Bulterys PL, Garamani N, Stevens B, Sahoo MK, Huang C, Hogan CA, Zehnder J, Pinsky BA. 2020.  
130 Comparison of a laboratory-developed test targeting the envelope gene with three nucleic acid amplification  
131 tests for detection of SARS-CoV-2. *J Clin Virol Off Publ Pan Am Soc Clin Virol* 129:104427.
- 132 6. Hogan CA, Sahoo MK, Pinsky BA. 2020. Sample Pooling as a Strategy to Detect Community Transmission of  
133 SARS-CoV-2. *JAMA* 323:1967–1969.
- 134 7. In Vitro Diagnostics EUAs - Molecular Diagnostic Tests for SARS-CoV-2 | FDA.
- 135 8. Stanford Health Care Clinical Virology Laboratory. Food and Drug Administration Emergency Use  
136 Authorization: SARS-CoV-2 RT-PCR Assay.

137 **Supplemental Table 1.** Primer and Probe Oligonucleotide Sequences and Characteristics

138

| Oligonucleotide            | Sequence (5' → 3')               | 5' Mod | 3' Mod | Tm <sup>a</sup><br>Match<br>(°C) | Tm <sup>a</sup><br>Mismatch<br>(°C) | Sequence Conservation          |                                      |                             |                              |
|----------------------------|----------------------------------|--------|--------|----------------------------------|-------------------------------------|--------------------------------|--------------------------------------|-----------------------------|------------------------------|
|                            |                                  |        |        |                                  |                                     | NCBI Pre-12/2020<br>(n=31,027) | GISAID<br>B.1.427/B.1.429<br>(n=622) | GISAID B.1.1.7<br>(n=7,864) | GISAID<br>B.1.351<br>(n=341) |
| L452R_FWD                  | CTCTCTCAAAAAGGTT<br>TGAGATTAGACT | -      | -      | 62.7                             | -                                   | 99.6% (n=30,903)               | 100.0% (n=622)                       | 99.9% (n=7,856)             | 99.7% (n=340)                |
| L452R_REV                  | CTTGATTCTAAGGTT<br>GGTGGTAA      | -      | -      | 60.5                             | -                                   | 99.0% (n=30,695)               | 99.5% (n=619)                        | 99.8% (n=7,850)             | 98.8% (n=337)                |
| L452R_MT_HEX               | CCTAAACAATCTATA<br>CCGGTAATT     | HEX    | BHQ    | 58.7                             | 51.6                                | <0.1% (n=19)                   | 100.0% (n=622)                       | 0.0% (n=0)                  | 0.0% (n=0)                   |
| E484K_FWD                  | CTGAAATCTATCAGG<br>CCGGTA        | -      | -      | 61.2                             | -                                   | 99.4% (n=30,823)               | 99.7% (n=620)                        | 99.7% (n=7,843)             | 99.7% (n=340)                |
| E484K_REV                  | GAAAGTACTACTACT<br>CTGTATGG      | -      | -      | 57.4                             | -                                   | 98.6% (n=30,584)               | 99.7% (n=620)                        | 99.8% (n=7,850)             | 98.5% (n=336)                |
| E484K_MT_CY5               | CTTGTAATGGTGTTA<br>AAGGTTT       | CY5    | BHQ    | 57.6                             | 53.7                                | <0.1% (n=13)                   | 0.0% (n=0)                           | <0.1% (n=1)                 | 99.7% (n=340)                |
| N501Y_MT_FAM <sup>b</sup>  | TTTCCAACCCACTTA<br>TGGT          | FAM    | BHQ    | 59.0                             | 54.8                                | 0.1% (n=38)                    | 0.0% (n=0)                           | 100.0% (n=7,861)            | 99.7% (n=340)                |
| N501_WT_CY3.5 <sup>b</sup> | TTTCCAACCCACTAA<br>TGGT          | CY3.5  | BHQ    | 59.0                             | 56.8                                | 99.2% (n=30,773)               | 100.0% (n=622)                       | 0.0% (n=0)                  | 0.0% (n=0)                   |

Mod, modification; Tm, melt temperature; FWD, forward; REV, reverse; WT, wild-type; MT, mutant. A hyphen (-) indicates this cell is not applicable for this row (e.g., no 5' modification for the L452R\_FWD primer).

<sup>a</sup> Calculated using IDT OligoAnalyzer (<https://www.idtdna.com/pages/tools/oligoanalyzer>) using qPCR conditions (DNA, 0.2µM [oligonucleotide], 50mM [Na<sup>+</sup>], 3mM [Mg<sup>2+</sup>], 0.8mM [dNTPs]). Mismatch Tm is for wild-type → mutant or mutant → wild-type nucleotide annealing.

<sup>b</sup> Anneals to E484K\_FWD/REV amplicon downstream of E484K\_MT\_CY5.

139

140 **Supplemental Table 2. Mutant Amplicon Controls**

141

| Oligonucleotide <sup>a</sup> | NC_045512 Polymorphism | Amplicon Length | Sequence (5' → 3')                                                                                                                        |
|------------------------------|------------------------|-----------------|-------------------------------------------------------------------------------------------------------------------------------------------|
| ssDNA_L452R_MT               | 22917 T>G              | 79              | CTCTCTCAAAAAGGTTTGAGATTAGACTTCCTAAACAATCTATACCGGTAATTATAATTACCACCAACCTTAGAATCAAG                                                          |
| ssDNA_del69-70_MT            | del21765-70            | 113             | ACATTCAACTCAGGACTTGTTCTTACCTTTCTTTTCCAATGTTACTTGGTTCATGCTATCTCTGGGACCAATGGTACTAAGAGGTTTGATAACCCTGTCCACCATTTAATG                           |
| ssDNA_K417N_MT               | 22813G>T               | 101             | CATTTGTAATTAGAGGTGATGAAGTCAGACAAAATCGCTCCAGGGCAAACCTGGAAATATTGCTGATTATAATTATAAAATTACCAGATGATTTTACAGGCTGC                                  |
| ssDNA_E484K_MT               | 23012G>A               | 133             | CTGAAATCTATCAGGCCGGTAGCACACCTTGTAATGGTGTAAAGGTTTTAATTGTTACTTTCCCTTTACAATCATATGGTTTTCCAACCCACTTATGGTGTGGTTACCAACCATACAGAGTAGTAGTACTTTT     |
| ssDNA_N501Y_MT               | 23063A>T               | 134             | GTTTTAATTGTTACTTTCCCTTTACAATCATATGGTTTTCCAACCCACTTATGGTGTGGTTACCAACCATACAGAGTAGTAGTACTTTCTTTTGAACCTTCTACATGCACCAGCAACTGTTTGTGGACCCTAAAAAG |
| ssDNA_P681H_MT               | 23604C>A               | 99              | CAGGTATATGCGCTAGTTATCAGACTCAGACTAATTCTCATCGGCGGGCACGTAGTGTAGCTAGTCAATCCATCATTGCCCTACACTATGTCACCTGGTG                                      |

MT, mutant.

<sup>a</sup> Individual ssDNA amplicons were pooled in equimolar ratios diluted to 10<sup>4</sup> copies/μL each in Tris-EDTA buffer to create a mutant control.

142

143 **Supplemental Table 3.** Multiplex RT-PCR Reagents and Concentrations

144

| Reagent                                                                     | Stock Concentration | Volume (μL)      | PCR Reaction Concentration |
|-----------------------------------------------------------------------------|---------------------|------------------|----------------------------|
| L452R_FWD                                                                   | 9000 nM             | 1.0 <sup>a</sup> | 360 nM                     |
| L452R_REV                                                                   | 9000 nM             | -                | 360 nM                     |
| E484K_FWD                                                                   | 9000 nM             | -                | 360 nM                     |
| E484K_REV                                                                   | 9000 nM             | -                | 360 nM                     |
| L452R_MT_HEX                                                                | 2000 nM             | -                | 80 nM                      |
| E484K_MT_CY5                                                                | 2000 nM             | -                | 80 nM                      |
| N501Y_MT_FAM                                                                | 2000 nM             | -                | 80 nM                      |
| N501_WT_CY3.5                                                               | 2000 nM             | -                | 80 nM                      |
| SuperScript™ III Platinum™ One-Step qRT-PCR Kit 2X Mix <sup>b</sup>         | 2X                  | 12.5             | 1X                         |
| SuperScript™ III Platinum™ One-Step qRT-PCR Kit <i>Taq</i> Mix <sup>b</sup> | -                   | 0.5              | -                          |
| Nuclease-free Water                                                         | -                   | 6.0              | -                          |
| Template <sup>c</sup>                                                       | -                   | 5.0              | -                          |
| <b>Total</b>                                                                | -                   | <b>25.0</b>      | -                          |

MT, mutant; WT, wild-type; nM, nanomolar. A hyphen (-) indicates this cell is not applicable for this row (e.g., PCR template does not have a known stock concentration or PCR reaction concentration).

<sup>a</sup> 1.0μL primer/probe mix at stock concentrations listed above.

<sup>b</sup> Catalog Numbers 11732-020 and 11732-088

<sup>c</sup> Wild-type TWIST whole-genome synthetic RNA control, pooled mutant amplicon control (Supplemental Table 2), or extracted nucleic acids from clinical upper respiratory swabs.

145

| Template                                   | Instrument Result <sup>a</sup> |                    |                    |                    | Triage                       | Final Report   |                |                |                                     |
|--------------------------------------------|--------------------------------|--------------------|--------------------|--------------------|------------------------------|----------------|----------------|----------------|-------------------------------------|
|                                            | N501 (Cy3.5)                   | N501Y (FAM)        | E484K (Cy5)        | L452R (HEX)        | Action                       | L452R Mutation | E484K Mutation | N501Y Mutation | Interpretative Comment <sup>b</sup> |
| Wild-type TWIST Control                    | C <sub>t</sub> <38             | ndet               | ndet               | ndet               | Negative QC Passed           | -              | -              | -              | -                                   |
| Mutant ssDNA Control                       | ndet                           | C <sub>t</sub> <38 | C <sub>t</sub> <38 | C <sub>t</sub> <38 | Positive QC Passed           | -              | -              | -              | -                                   |
| Patient Samples:<br>Upper Respiratory Swab | C <sub>t</sub> ≤40             | ndet               | ndet               | ndet               | Report                       | Not Detected   | Not Detected   | Not Detected   | 1 (below)                           |
|                                            | C <sub>t</sub> ≤40             | ndet               | C <sub>t</sub> ≤40 | ndet               | Report                       | Not Detected   | Detected       | Not Detected   | 2 (below)                           |
|                                            | C <sub>t</sub> ≤40             | ndet               | ndet               | C <sub>t</sub> ≤40 | Report                       | Detected       | Not Detected   | Not Detected   | 3 (below)                           |
|                                            | ndet                           | C <sub>t</sub> ≤40 | C <sub>t</sub> ≤40 | ndet               | Report                       | Not Detected   | Detected       | Detected       | 4 (below)                           |
|                                            | ndet                           | C <sub>t</sub> ≤40 | ndet               | ndet               | Report                       | Not Detected   | Not Detected   | Detected       | 5 (below)                           |
|                                            | ndet                           | ndet               | ndet               | ndet               | Repeat PCR <sup>c</sup>      | -              | -              | -              | -                                   |
|                                            | C <sub>t</sub> ≤40             | C <sub>t</sub> ≤40 | C <sub>t</sub> ≤40 | C <sub>t</sub> ≤40 | Director Review <sup>d</sup> | -              | -              | -              | -                                   |
|                                            | C <sub>t</sub> ≤40             | C <sub>t</sub> ≤40 | C <sub>t</sub> ≤40 | ndet               | Director Review              | -              | -              | -              | -                                   |
|                                            | C <sub>t</sub> ≤40             | C <sub>t</sub> ≤40 | ndet               | C <sub>t</sub> ≤40 | Director Review              | -              | -              | -              | -                                   |
|                                            | C <sub>t</sub> ≤40             | C <sub>t</sub> ≤40 | ndet               | ndet               | Director Review              | -              | -              | -              | -                                   |
|                                            | C <sub>t</sub> ≤40             | ndet               | C <sub>t</sub> ≤40 | C <sub>t</sub> ≤40 | Director Review <sup>e</sup> | -              | -              | -              | -                                   |
|                                            | ndet                           | C <sub>t</sub> ≤40 | C <sub>t</sub> ≤40 | C <sub>t</sub> ≤40 | Director Review              | -              | -              | -              | -                                   |
|                                            | ndet                           | C <sub>t</sub> ≤40 | ndet               | C <sub>t</sub> ≤40 | Director Review              | -              | -              | -              | -                                   |
|                                            | ndet                           | ndet               | C <sub>t</sub> ≤40 | C <sub>t</sub> ≤40 | Director Review <sup>f</sup> | -              | -              | -              | -                                   |
| ndet                                       | ndet                           | C <sub>t</sub> ≤40 | ndet               | Director Review    | -                            | -              | -              | -              |                                     |
| ndet                                       | ndet                           | ndet               | C <sub>t</sub> ≤40 | Director Review    | -                            | -              | -              | -              |                                     |

C<sub>t</sub>, cycle threshold; ndet, not detected; RFU, relative fluorescence units, QC, quality control. A hyphen (-) indicates this cell is not applicable for this row (e.g., wild-type TWIST control and mutant ssDNA pool control results are for quality control and are not reported to the medical record).

<sup>a</sup> Channel thresholds: 500 RFU (FAM), 1000 RFU (HEX), 50 RFU (Cy3.5), 200 RFU (Cy5).

<sup>b</sup> Interpretative comments reported to medical record:

1. “These results do not rule out the presence of mutations other than L452R, E484K, and N501Y, or the possibility that L452R, N501Y, and/or E484K mutations are present below the assay lower limit of detection. These results should not be used as the sole basis for patient management decisions.”

---

2. “The presence of the E484K mutation without the N501Y mutation has been reported most commonly in SARS-CoV-2 lineages P.2, B.1.525, and B.1.526. It can also be seen sporadically, and in other lineages, and therefore cannot be used to definitively assign a variant/lineage/clade identity. Detection of E484K does not preclude the possibility of a mixed infection containing both mutant and wildtype SARS-CoV-2. These results do not rule out the presence of mutations other than L452R, E484K, and N501Y, or the possibility that N501Y and/or L452R are present at levels below the assay limit of detection. These results should not be used as the sole basis for patient management decisions.”

3. “The presence of the L452R mutation has been reported most commonly in SARS-CoV-2 lineages B.1.429 and B.1.427. It may be seen sporadically, and in other lineages, and therefore cannot be used to definitively assign a variant/lineage/clade identity. Detection of L452R does not preclude the possibility of a mixed infection containing both mutant and wildtype SARS-CoV-2. These results do not rule out the presence of mutations other than L452R, E484K, and N501Y, or the possibility that N501Y and/or E484K are present at levels below the assay limit of detection. These results should not be used as the sole basis for patient management decisions.”

4. “The presence of the E484K mutation and the N501Y mutation has been reported most commonly in SARS-CoV-2 lineages B.1.351 and P.1. They might also be seen sporadically and therefore cannot be used to definitively assign a variant/lineage/clade identity. Detection of these mutations does not preclude the possibility of a mixed infection containing both mutant and wildtype SARS-CoV-2. These results do not rule out the presence of mutations other than L452R, E484K, and N501Y, or the possibility that L452R is present at levels below the assay limit of detection. These results should not be used as the sole basis for patient management decisions.”

5. “The presence of N501Y mutation without the E484K mutation has been reported in a variety of SARS-CoV-2 lineages, most notably B.1.1.7. Detection of these mutations does not preclude the possibility of a mixed infection containing both mutant and wildtype SARS-CoV-2. These results do not rule out the presence of mutations other than L452R, E484K, and N501Y, or the possibility that E484K and/or L452 are present at levels below the assay limit of detection. These results should not be used as the sole basis for patient management decisions.”

<sup>c</sup> Possibly due to extraction failure, setup failure, or viral load below limit of detection. Consider repeating PCR with 11µL eluate in same reaction volume (no water). If same result after repeat, suggest reporting as “unable to genotype”.

<sup>d</sup> Conflicting results of N501 and N501Y detected. Possibilities include mixed infection, contamination, and/or nonspecific amplification, among others.

<sup>e</sup> Mutations uncommonly observed together. Possibilities include new/rare variant, mixed infection, contamination, or nonspecific amplification, among others.

<sup>f</sup> Failure of N501 locus to amplify. Possibilities include low viral load leading to other probes out-competing N501/N501Y, alternate mutation in N501 site, and nonspecific amplification, among others.

149 **Supplemental Table 5.** Analytical Performance: Multiplex Genotyping RT-qPCR Lower Limit of Detection

150

| Template and Concentration                                 | Number of Detected Replicates    |                    |                    |                    |
|------------------------------------------------------------|----------------------------------|--------------------|--------------------|--------------------|
|                                                            | N501 Wild-Type (Cy3.5)           | N501Y Mutant (FAM) | E484K Mutant (Cy5) | L452R Mutant (HEX) |
| Mutant ssDNA Control                                       |                                  |                    |                    |                    |
| 1.0 copies / $\mu$ L template                              | 0/20                             | 8/20               | 7/20               | 17/20              |
| 5.0 copies / $\mu$ L template                              | 0/20                             | 9/20               | 11/20              | 20/20              |
| 10.0 copies / $\mu$ L template                             | 0/20                             | 14/20              | 16/20              | 20/20              |
| 100.0 copies / $\mu$ L template                            | 0/20                             | 20/20              | 20/20              | 20/20              |
| 95% LLOD (95% CI) - copies / $\mu$ L template              | (appropriate ndet <sup>a</sup> ) | 23.6 (14.0-29.4)   | 16.0 (11.1-40.3)   | 1.5 (1.0-3.1)      |
| 95% LLOD (95% CI) - copies / $\mu$ L specimen <sup>b</sup> | (appropriate ndet <sup>a</sup> ) | 117.8 (70.0-147.2) | 79.9 (55.7-201.4)  | 7.5 (5.0-15.6)     |

LLOD, lower limit of detection; CI, confidence interval; ndet, not detected.

<sup>a</sup> Appropriate absence of Cy3.5 amplification (N501 wild-type) in all replicates.

<sup>b</sup> Extrapolated from nucleic acid extraction protocol: 300  $\mu$ L respiratory swab specimen extracted into 60  $\mu$ L elution buffer.

151

152 **Supplemental Table 6.** Analytical Performance: Multiplex Genotyping RT-qPCR Linearity in Replicates of Three Across Seven Orders of Magnitude  
 153 for the L452R (HEX), E484K (Cy5), and N501Y (FAM) Allele-Specific Hydrolysis Probes.

154

| Control Template | Concentration (copies/ $\mu$ L template) | Replicate C <sub>t</sub> Values     |                     |                     |                     | Coefficient of Variation (%)    |                                 |                                 |
|------------------|------------------------------------------|-------------------------------------|---------------------|---------------------|---------------------|---------------------------------|---------------------------------|---------------------------------|
|                  |                                          | N501 Wild-Type (Cy3.5) <sup>a</sup> | N501Y Mutant (FAM)  | E484K Mutant (Cy5)  | L452R Mutant (HEX)  | N501Y Mutant (FAM) <sup>b</sup> | E484K Mutant (Cy5) <sup>b</sup> | L452R Mutant (HEX) <sup>b</sup> |
| Mutant ssDNA     | 10 <sup>0</sup>                          | ndet x 3                            | 42.61, 43.10, 43.70 | 42.95, 42.62, 42.56 | 43.35, 43.34, 43.34 | 98.99%                          | 10.58%                          | 32.26%                          |
|                  | 10 <sup>1</sup>                          | ndet x 3                            | 39.43, 40.40, 41.50 | 39.62, 40.24, 41.03 | 39.67, 40.02, 40.32 | 31.92%                          | 9.58%                           | 23.06%                          |
|                  | 10 <sup>2</sup>                          | ndet x 3                            | 37.31, 36.48, 36.06 | 37.18, 36.83, 36.50 | 36.25, 36.43, 36.25 | 9.00%                           | 1.47%                           | 5.21%                           |
|                  | 10 <sup>3</sup>                          | ndet x 3                            | 34.29, 34.16, 34.42 | 34.01, 33.88, 33.93 | 33.33, 33.20, 33.16 | 1.38%                           | 0.87%                           | 0.70%                           |
|                  | 10 <sup>4</sup>                          | ndet x 3                            | 30.09, 30.02, 30.12 | 30.25, 30.00, 30.27 | 29.54, 29.53, 29.57 | 0.38%                           | 0.15%                           | 1.14%                           |
|                  | 10 <sup>5</sup>                          | ndet x 3                            | 26.94, 26.72, 26.66 | 26.78, 26.70, 26.71 | 26.04, 26.05, 26.02 | 0.87%                           | 0.09%                           | 0.26%                           |
|                  | 10 <sup>6</sup>                          | ndet x 3                            | 23.14, 23.03, 22.98 | 23.25, 23.22, 23.17 | 22.65, 22.61, 22.64 | 0.40%                           | 0.10%                           | 0.20%                           |
|                  | R <sup>2</sup>                           | -                                   | 0.9925              | 0.9955              | 0.9995              | -                               | -                               | -                               |
| Wild-Type TWIST  | 10 <sup>4</sup>                          | 22.64                               | ndet                | ndet                | ndet                | -                               | -                               | -                               |
|                  | 10 <sup>6</sup>                          | 27.33                               | ndet                | ndet                | ndet                | -                               | -                               | -                               |

C<sub>t</sub>, cycle threshold. A hyphen (-) indicates this cell is not applicable for this row (e.g., no applicable coefficient of variation for the L452R, E484K, and N501Y mutations for the TWIST control, as these mutations are neither present nor detected in the wild-type template).

<sup>a</sup> Appropriate absence of Cy3.5 amplification (N501 wild-type) in all replicates.

<sup>b</sup> Based on standard curves: N501Y-FAM: copies/ $\mu$ L template = 10<sup>^(12.888-0.295\*C<sub>t</sub>)</sup>; E484K-Cy5: copies/ $\mu$ L template = 10<sup>^(13.095-0.302\*C<sub>t</sub>)</sup>; L452R-HEX: copies/ $\mu$ L template = 10<sup>^(12.542-0.289\*C<sub>t</sub>)</sup>

155

156 **Supplemental Table 7.** Whole Genome Next-Generation Sequencing Quality Measures for Subset of 229 Sequenced Specimens Genotyped by RT-  
157 qPCR

158

| <b>Sequencing Quality Measure</b>             | <b>Median (Interquartile Range)</b> |
|-----------------------------------------------|-------------------------------------|
| Number of specimens                           | 229                                 |
| Diagnostic specimen NAAT C <sub>t</sub> value | 17.9 (15.6 - 20.9)                  |
| Number of aligned reads                       | 664,369 (512,314 - 816,797)         |
| Whole-genome coverage at 10X depth            | 99.3% (99.0 - 99.4%)                |
| Whole-genome mean coverage                    | 834.7 (689.5 - 911.4)               |
| Spike protein coverage at 10X depth           | >99.9% (99.9 - >99.9%)              |
| Spike protein mean coverage                   | 829.2 (615.1 - 954.5)               |

NAAT, nucleic acid amplification test.

159

160 **Supplemental Table 8.** GISAID Accession Identification Numbers for 229 Sequenced Specimens Genotyped by RT-qPCR

| RT-qPCR Genotype Group | GISAID Accession ID                                             |
|------------------------|-----------------------------------------------------------------|
| L452, E484, N501       | >hCoV-19/USA/CA-Stanford-01_S03/2020 EPI_ISL_1379719 2020-12-10 |
|                        | >hCoV-19/USA/CA-Stanford-01_S04/2020 EPI_ISL_1424067 2020-12-10 |
|                        | >hCoV-19/USA/CA-Stanford-01_S05/2020 EPI_ISL_1379720 2020-12-10 |
|                        | >hCoV-19/USA/CA-Stanford-01_S06/2020 EPI_ISL_1379721 2020-12-10 |
|                        | >hCoV-19/USA/CA-Stanford-01_S16/2020 EPI_ISL_1379722 2020-12-15 |
|                        | >hCoV-19/USA/CA-Stanford-01_S20/2020 EPI_ISL_1379723 2020-12-17 |
|                        | >hCoV-19/USA/CA-Stanford-01_S21/2020 EPI_ISL_1379724 2020-12-19 |
|                        | >hCoV-19/USA/CA-Stanford-01_S25/2020 EPI_ISL_1424068 2020-12-06 |
|                        | >hCoV-19/USA/CA-Stanford-01_S26/2020 EPI_ISL_1424069 2020-12-06 |
|                        | >hCoV-19/USA/CA-Stanford-01_S27/2020 EPI_ISL_2009071 2020-12-09 |
|                        | >hCoV-19/USA/CA-Stanford-01_S38/2020 EPI_ISL_1424070 2020-12-07 |
|                        | >hCoV-19/USA/CA-Stanford-01_S39/2020 EPI_ISL_1424071 2020-12-07 |
|                        | >hCoV-19/USA/CA-Stanford-02_S01/2021 EPI_ISL_1379727 2021-01-12 |
|                        | >hCoV-19/USA/CA-Stanford-02_S02/2021 EPI_ISL_1379728 2021-01-12 |
|                        | >hCoV-19/USA/CA-Stanford-02_S03/2021 EPI_ISL_1379729 2021-01-12 |
|                        | >hCoV-19/USA/CA-Stanford-02_S04/2021 EPI_ISL_1424072 2021-01-12 |
|                        | >hCoV-19/USA/CA-Stanford-02_S06/2020 EPI_ISL_1379731 2020-12-06 |
|                        | >hCoV-19/USA/CA-Stanford-02_S07/2021 EPI_ISL_1379732 2021-01-12 |
|                        | >hCoV-19/USA/CA-Stanford-02_S08/2020 EPI_ISL_1379733 2020-12-08 |
|                        | >hCoV-19/USA/CA-Stanford-02_S10/2021 EPI_ISL_1379734 2021-01-12 |
|                        | >hCoV-19/USA/CA-Stanford-02_S11/2021 EPI_ISL_1379735 2021-01-12 |
|                        | >hCoV-19/USA/CA-Stanford-02_S15/2021 EPI_ISL_1379737 2021-01-12 |
|                        | >hCoV-19/USA/CA-Stanford-02_S17/2021 EPI_ISL_1379738 2021-01-12 |
|                        | >hCoV-19/USA/CA-Stanford-02_S21/2021 EPI_ISL_1379739 2021-01-12 |
|                        | >hCoV-19/USA/CA-Stanford-02_S23/2021 EPI_ISL_1379740 2021-01-12 |
|                        | >hCoV-19/USA/CA-Stanford-02_S24/2021 EPI_ISL_1379741 2021-01-12 |
|                        | >hCoV-19/USA/CA-Stanford-02_S25/2021 EPI_ISL_1379742 2021-01-12 |
|                        | >hCoV-19/USA/CA-Stanford-02_S27/2021 EPI_ISL_1379743 2021-01-12 |
|                        | >hCoV-19/USA/CA-Stanford-02_S28/2021 EPI_ISL_1379744 2021-01-12 |
|                        | >hCoV-19/USA/CA-Stanford-02_S29/2021 EPI_ISL_1379745 2021-01-12 |
|                        | >hCoV-19/USA/CA-Stanford-02_S30/2021 EPI_ISL_1379746 2021-01-12 |
|                        | >hCoV-19/USA/CA-Stanford-02_S32/2021 EPI_ISL_1379747 2021-01-12 |
|                        | >hCoV-19/USA/CA-Stanford-02_S33/2021 EPI_ISL_1379748 2021-01-12 |
|                        | >hCoV-19/USA/CA-Stanford-02_S37/2021 EPI_ISL_1379749 2021-01-12 |

---

>hCoV-19/USA/CA-Stanford-02\_S42/2021|EPI\_ISL\_1379750|2021-01-13  
>hCoV-19/USA/CA-Stanford-02\_S45/2020|EPI\_ISL\_1379751|2020-12-13  
>hCoV-19/USA/CA-Stanford-02\_S46/2021|EPI\_ISL\_1424073|2021-01-13  
>hCoV-19/USA/CA-Stanford-03\_S08/2021|EPI\_ISL\_1379756|2021-01-05  
>hCoV-19/USA/CA-Stanford-03\_S10/2021|EPI\_ISL\_1379757|2021-01-05  
>hCoV-19/USA/CA-Stanford-03\_S11/2021|EPI\_ISL\_1424076|2021-01-05  
>hCoV-19/USA/CA-Stanford-03\_S18/2021|EPI\_ISL\_1424078|2021-01-05  
>hCoV-19/USA/CA-Stanford-03\_S21/2021|EPI\_ISL\_1379763|2021-01-05  
>hCoV-19/USA/CA-Stanford-03\_S23/2021|EPI\_ISL\_1379764|2021-01-05  
>hCoV-19/USA/CA-Stanford-03\_S24/2021|EPI\_ISL\_1379765|2021-01-05  
>hCoV-19/USA/CA-Stanford-03\_S25/2021|EPI\_ISL\_1379766|2021-01-05  
>hCoV-19/USA/CA-Stanford-03\_S27/2021|EPI\_ISL\_1379768|2021-01-05  
>hCoV-19/USA/CA-Stanford-03\_S29/2021|EPI\_ISL\_1379770|2021-01-04  
>hCoV-19/USA/CA-Stanford-03\_S31/2021|EPI\_ISL\_1379771|2021-01-02  
>hCoV-19/USA/CA-Stanford-03\_S37/2021|EPI\_ISL\_1424079|2021-01-02  
>hCoV-19/USA/CA-Stanford-03\_S38/2021|EPI\_ISL\_1379774|2021-01-02  
>hCoV-19/USA/CA-Stanford-03\_S40/2021|EPI\_ISL\_1424080|2021-01-02  
>hCoV-19/USA/CA-Stanford-03\_S42/2021|EPI\_ISL\_1379776|2021-01-02  
>hCoV-19/USA/CA-Stanford-03\_S45/2021|EPI\_ISL\_1364503|2021-01-18  
>hCoV-19/USA/CA-Stanford-04\_S05/2021|EPI\_ISL\_1424081|2021-01-23  
>hCoV-19/USA/CA-Stanford-04\_S13/2021|EPI\_ISL\_1379783|2021-01-18  
>hCoV-19/USA/CA-Stanford-04\_S21/2021|EPI\_ISL\_1379788|2021-01-18  
>hCoV-19/USA/CA-Stanford-04\_S23/2021|EPI\_ISL\_1379789|2021-01-19  
>hCoV-19/USA/CA-Stanford-04\_S35/2021|EPI\_ISL\_1379796|2021-01-20  
>hCoV-19/USA/CA-Stanford-04\_S36/2021|EPI\_ISL\_1424086|2021-01-20  
>hCoV-19/USA/CA-Stanford-04\_S38/2021|EPI\_ISL\_1379798|2021-01-20  
>hCoV-19/USA/CA-Stanford-04\_S39/2021|EPI\_ISL\_1379799|2021-01-21  
>hCoV-19/USA/CA-Stanford-04\_S40/2021|EPI\_ISL\_1379800|2021-01-21  
>hCoV-19/USA/CA-Stanford-04\_S41/2021|EPI\_ISL\_1379801|2021-01-21  
>hCoV-19/USA/CA-Stanford-04\_S43/2021|EPI\_ISL\_1379803|2021-01-22  
>hCoV-19/USA/CA-Stanford-04\_S44/2021|EPI\_ISL\_1379804|2021-01-21  
>hCoV-19/USA/CA-Stanford-05\_S35/2021|EPI\_ISL\_1379820|2021-01-24  
>hCoV-19/USA/CA-Stanford-05\_S36/2021|EPI\_ISL\_1379821|2021-01-23  
>hCoV-19/USA/CA-Stanford-05\_S44/2021|EPI\_ISL\_1379826|2021-01-23  
>hCoV-19/USA/CA-Stanford-05\_S47/2021|EPI\_ISL\_1379827|2021-01-20  
>hCoV-19/USA/CA-Stanford-06\_S20/2021|EPI\_ISL\_1424093|2021-01-12

---

---

>hCoV-19/USA/CA-Stanford-06\_S39/2021|EPI\_ISL\_1379848|2021-01-29  
>hCoV-19/USA/CA-Stanford-06\_S40/2021|EPI\_ISL\_1379849|2021-01-01  
>hCoV-19/USA/CA-Stanford-06\_S45/2021|EPI\_ISL\_1379853|2021-01-31  
>hCoV-19/USA/CA-Stanford-07\_S14/2021|EPI\_ISL\_1379855|2021-01-11  
>hCoV-19/USA/CA-Stanford-07\_S27/2021|EPI\_ISL\_1379856|2021-01-07  
>hCoV-19/USA/CA-Stanford-07\_S30/2021|EPI\_ISL\_1379857|2021-01-31  
>hCoV-19/USA/CA-Stanford-07\_S42/2021|EPI\_ISL\_1379866|2021-01-29  
>hCoV-19/USA/CA-Stanford-07\_S45/2021|EPI\_ISL\_1379869|2021-01-30  
>hCoV-19/USA/CA-Stanford-07\_S46/2021|EPI\_ISL\_1379870|2021-01-29  
>hCoV-19/USA/CA-Stanford-08\_S02/2021|EPI\_ISL\_1379872|2021-01-07  
>hCoV-19/USA/CA-Stanford-08\_S04/2021|EPI\_ISL\_1379874|2021-01-23  
>hCoV-19/USA/CA-Stanford-08\_S06/2021|EPI\_ISL\_1379876|2021-01-17  
>hCoV-19/USA/CA-Stanford-08\_S07/2021|EPI\_ISL\_1424103|2021-01-23  
>hCoV-19/USA/CA-Stanford-08\_S12/2021|EPI\_ISL\_1379877|2021-01-23  
>hCoV-19/USA/CA-Stanford-09\_S13/2021|EPI\_ISL\_1379884|2021-01-22  
>hCoV-19/USA/CA-Stanford-09\_S15/2021|EPI\_ISL\_1424107|2021-01-23  
>hCoV-19/USA/CA-Stanford-09\_S16/2021|EPI\_ISL\_1424108|2021-01-23  
>hCoV-19/USA/CA-Stanford-09\_S17/2021|EPI\_ISL\_1424109|2021-01-23  
>hCoV-19/USA/CA-Stanford-09\_S18/2021|EPI\_ISL\_1424110|2021-01-23  
>hCoV-19/USA/CA-Stanford-09\_S19/2021|EPI\_ISL\_1424111|2021-01-23  
>hCoV-19/USA/CA-Stanford-09\_S23/2021|EPI\_ISL\_1424112|2021-01-24  
>hCoV-19/USA/CA-Stanford-09\_S24/2021|EPI\_ISL\_1379885|2021-01-24  
>hCoV-19/USA/CA-Stanford-09\_S25/2021|EPI\_ISL\_1424113|2021-01-24  
>hCoV-19/USA/CA-Stanford-09\_S26/2021|EPI\_ISL\_1379886|2021-01-25  
>hCoV-19/USA/CA-Stanford-09\_S30/2021|EPI\_ISL\_1424114|2021-01-25  
>hCoV-19/USA/CA-Stanford-09\_S39/2021|EPI\_ISL\_1424115|2021-01-26  
>hCoV-19/USA/CA-Stanford-10\_S23/2021|EPI\_ISL\_1424126|2021-01-27  
>hCoV-19/USA/CA-Stanford-10\_S25/2021|EPI\_ISL\_1424127|2021-02-02  
>hCoV-19/USA/CA-Stanford-10\_S38/2021|EPI\_ISL\_1379887|2021-02-03  
>hCoV-19/USA/CA-Stanford-10\_S42/2021|EPI\_ISL\_1379888|2021-02-04  
>hCoV-19/USA/CA-Stanford-10\_S43/2021|EPI\_ISL\_1424129|2021-02-05  
>hCoV-19/USA/CA-Stanford-11\_S08/2021|EPI\_ISL\_2027144|2021-02-05  
>hCoV-19/USA/CA-Stanford-11\_S10/2021|EPI\_ISL\_2027177|2021-02-05  
>hCoV-19/USA/CA-Stanford-11\_S12/2021|EPI\_ISL\_2027178|2021-02-05  
>hCoV-19/USA/CA-Stanford-11\_S13/2021|EPI\_ISL\_2027183|2021-02-05  
>hCoV-19/USA/CA-Stanford-11\_S15/2021|EPI\_ISL\_2027185|2021-02-08

---

|                   |                                                                                                                                                                                                                                                                                                                                                                                                                                                                                                                                                                                                                                                                                                                                                                                                                                                                                                                                                                                                                                                                                                                                                                                                                                                                                                                                                                                                                                                                                                                                |
|-------------------|--------------------------------------------------------------------------------------------------------------------------------------------------------------------------------------------------------------------------------------------------------------------------------------------------------------------------------------------------------------------------------------------------------------------------------------------------------------------------------------------------------------------------------------------------------------------------------------------------------------------------------------------------------------------------------------------------------------------------------------------------------------------------------------------------------------------------------------------------------------------------------------------------------------------------------------------------------------------------------------------------------------------------------------------------------------------------------------------------------------------------------------------------------------------------------------------------------------------------------------------------------------------------------------------------------------------------------------------------------------------------------------------------------------------------------------------------------------------------------------------------------------------------------|
|                   | >hCoV-19/USA/CA-Stanford-11_S16/2021 EPI_ISL_2027187 2021-02-08<br>>hCoV-19/USA/CA-Stanford-11_S17/2021 EPI_ISL_2027191 2021-02-08<br>>hCoV-19/USA/CA-Stanford-11_S18/2021 EPI_ISL_2027195 2021-02-08<br>>hCoV-19/USA/CA-Stanford-11_S20/2021 EPI_ISL_2027198 2021-02-08<br>>hCoV-19/USA/CA-Stanford-11_S22/2021 EPI_ISL_2027153 2021-01-26<br>>hCoV-19/USA/CA-Stanford-11_S23/2021 EPI_ISL_2027157 2021-01-26<br>>hCoV-19/USA/CA-Stanford-11_S30/2021 EPI_ISL_2027202 2021-01-27<br>>hCoV-19/USA/CA-Stanford-11_S33/2021 EPI_ISL_2027160 2021-01-27<br>>hCoV-19/USA/CA-Stanford-11_S36/2021 EPI_ISL_2027164 2021-01-20<br>>hCoV-19/USA/CA-Stanford-11_S39/2021 EPI_ISL_2027208 2021-01-21<br>>hCoV-19/USA/CA-Stanford-11_S40/2021 EPI_ISL_2027212 2021-01-21<br>>hCoV-19/USA/CA-Stanford-11_S43/2021 EPI_ISL_2027215 2021-01-21<br>>hCoV-19/USA/CA-Stanford-11_S44/2021 EPI_ISL_2027218 2021-01-21<br>>hCoV-19/USA/CA-Stanford-11_S45/2021 EPI_ISL_2027221 2021-01-21                                                                                                                                                                                                                                                                                                                                                                                                                                                                                                                                                         |
| L452R, E484, N501 | >hCoV-19/USA/CA-Stanford-01_S19/2020 EPI_ISL_2009070 2020-12-05<br>>hCoV-19/USA/CA-Stanford-01_S31/2020 EPI_ISL_1379726 2020-12-12<br>>hCoV-19/USA/CA-Stanford-02_S12/2021 EPI_ISL_1364488 2021-01-12<br>>hCoV-19/USA/CA-Stanford-02_S13/2021 EPI_ISL_1379736 2021-01-12<br>>hCoV-19/USA/CA-Stanford-02_S14/2021 EPI_ISL_1364489 2021-01-12<br>>hCoV-19/USA/CA-Stanford-02_S16/2021 EPI_ISL_1364490 2021-01-12<br>>hCoV-19/USA/CA-Stanford-02_S18/2021 EPI_ISL_1364491 2021-01-12<br>>hCoV-19/USA/CA-Stanford-02_S19/2021 EPI_ISL_1364492 2021-01-12<br>>hCoV-19/USA/CA-Stanford-02_S20/2021 EPI_ISL_1364493 2021-01-12<br>>hCoV-19/USA/CA-Stanford-02_S22/2021 EPI_ISL_1364494 2021-01-12<br>>hCoV-19/USA/CA-Stanford-02_S34/2021 EPI_ISL_1364495 2021-01-12<br>>hCoV-19/USA/CA-Stanford-02_S36/2021 EPI_ISL_1364496 2021-01-12<br>>hCoV-19/USA/CA-Stanford-02_S39/2021 EPI_ISL_1364497 2021-01-13<br>>hCoV-19/USA/CA-Stanford-02_S43/2021 EPI_ISL_1364499 2021-01-13<br>>hCoV-19/USA/CA-Stanford-02_S47/2021 EPI_ISL_1364500 2021-01-13<br>>hCoV-19/USA/CA-Stanford-03_S04/2021 EPI_ISL_1379753 2021-01-04<br>>hCoV-19/USA/CA-Stanford-03_S06/2021 EPI_ISL_1379754 2021-01-05<br>>hCoV-19/USA/CA-Stanford-03_S07/2021 EPI_ISL_1379755 2021-01-05<br>>hCoV-19/USA/CA-Stanford-03_S09/2021 EPI_ISL_1424075 2021-01-05<br>>hCoV-19/USA/CA-Stanford-03_S12/2021 EPI_ISL_1379758 2021-01-05<br>>hCoV-19/USA/CA-Stanford-03_S13/2021 EPI_ISL_1379759 2021-01-05<br>>hCoV-19/USA/CA-Stanford-03_S15/2021 EPI_ISL_1379760 2021-01-05 |

---

>hCoV-19/USA/CA-Stanford-03\_S16/2021|EPI\_ISL\_1379761|2021-01-04  
>hCoV-19/USA/CA-Stanford-03\_S19/2021|EPI\_ISL\_1379762|2021-01-05  
>hCoV-19/USA/CA-Stanford-03\_S26/2021|EPI\_ISL\_1379767|2021-01-05  
>hCoV-19/USA/CA-Stanford-03\_S28/2021|EPI\_ISL\_1379769|2021-01-05  
>hCoV-19/USA/CA-Stanford-03\_S34/2021|EPI\_ISL\_1379772|2021-01-02  
>hCoV-19/USA/CA-Stanford-03\_S35/2021|EPI\_ISL\_1379773|2021-01-02  
>hCoV-19/USA/CA-Stanford-03\_S39/2021|EPI\_ISL\_1379775|2021-01-02  
>hCoV-19/USA/CA-Stanford-03\_S43/2021|EPI\_ISL\_1379777|2021-01-02  
>hCoV-19/USA/CA-Stanford-04\_S04/2021|EPI\_ISL\_1379780|2021-01-24  
>hCoV-19/USA/CA-Stanford-04\_S06/2021|EPI\_ISL\_1379781|2021-01-22  
>hCoV-19/USA/CA-Stanford-04\_S11/2021|EPI\_ISL\_1424082|2021-01-18  
>hCoV-19/USA/CA-Stanford-04\_S15/2021|EPI\_ISL\_1379784|2021-01-23  
>hCoV-19/USA/CA-Stanford-04\_S16/2021|EPI\_ISL\_1424084|2021-01-18  
>hCoV-19/USA/CA-Stanford-04\_S18/2021|EPI\_ISL\_1379785|2021-01-18  
>hCoV-19/USA/CA-Stanford-04\_S19/2021|EPI\_ISL\_1379786|2021-01-18  
>hCoV-19/USA/CA-Stanford-04\_S20/2021|EPI\_ISL\_1379787|2021-01-18  
>hCoV-19/USA/CA-Stanford-04\_S27/2021|EPI\_ISL\_1379792|2021-01-19  
>hCoV-19/USA/CA-Stanford-04\_S28/2021|EPI\_ISL\_1424085|2021-01-19  
>hCoV-19/USA/CA-Stanford-04\_S29/2021|EPI\_ISL\_1379793|2021-01-19  
>hCoV-19/USA/CA-Stanford-04\_S37/2021|EPI\_ISL\_1379797|2021-01-20  
>hCoV-19/USA/CA-Stanford-04\_S42/2021|EPI\_ISL\_1379802|2021-01-21  
>hCoV-19/USA/CA-Stanford-05\_S04/2021|EPI\_ISL\_1379807|2021-01-23  
>hCoV-19/USA/CA-Stanford-05\_S13/2021|EPI\_ISL\_1379809|2021-01-22  
>hCoV-19/USA/CA-Stanford-05\_S14/2021|EPI\_ISL\_1379810|2021-01-20  
>hCoV-19/USA/CA-Stanford-05\_S16/2021|EPI\_ISL\_1379811|2021-01-20  
>hCoV-19/USA/CA-Stanford-05\_S20/2021|EPI\_ISL\_1379812|2021-01-23  
>hCoV-19/USA/CA-Stanford-05\_S29/2021|EPI\_ISL\_1379816|2021-01-22  
>hCoV-19/USA/CA-Stanford-05\_S32/2021|EPI\_ISL\_1379817|2021-01-20  
>hCoV-19/USA/CA-Stanford-05\_S37/2021|EPI\_ISL\_1379822|2021-01-22  
>hCoV-19/USA/CA-Stanford-05\_S38/2021|EPI\_ISL\_1379823|2021-01-21  
>hCoV-19/USA/CA-Stanford-06\_S06/2021|EPI\_ISL\_1424090|2021-01-31  
>hCoV-19/USA/CA-Stanford-06\_S08/2021|EPI\_ISL\_1379831|2021-01-28  
>hCoV-19/USA/CA-Stanford-06\_S14/2021|EPI\_ISL\_1424091|2021-01-31  
>hCoV-19/USA/CA-Stanford-06\_S15/2021|EPI\_ISL\_1379835|2021-01-29  
>hCoV-19/USA/CA-Stanford-06\_S16/2021|EPI\_ISL\_1379836|2021-01-28  
>hCoV-19/USA/CA-Stanford-06\_S32/2021|EPI\_ISL\_1379843|2021-01-01

---

|                   |                                                                                                                                                                                                                                                                                                                                                                                                                                                                                                                                                                                                                                                                                                                                                                                                                                                                                                                                                                        |
|-------------------|------------------------------------------------------------------------------------------------------------------------------------------------------------------------------------------------------------------------------------------------------------------------------------------------------------------------------------------------------------------------------------------------------------------------------------------------------------------------------------------------------------------------------------------------------------------------------------------------------------------------------------------------------------------------------------------------------------------------------------------------------------------------------------------------------------------------------------------------------------------------------------------------------------------------------------------------------------------------|
|                   | >hCoV-19/USA/CA-Stanford-06_S38/2021 EPI_ISL_1379847 2021-01-31<br>>hCoV-19/USA/CA-Stanford-06_S46/2021 EPI_ISL_1424098 2021-01-30<br>>hCoV-19/USA/CA-Stanford-07_S31/2021 EPI_ISL_1379858 2021-01-30<br>>hCoV-19/USA/CA-Stanford-07_S36/2021 EPI_ISL_1379862 2021-01-31<br>>hCoV-19/USA/CA-Stanford-07_S37/2021 EPI_ISL_1379863 2021-01-30<br>>hCoV-19/USA/CA-Stanford-07_S41/2021 EPI_ISL_1379865 2021-01-30<br>>hCoV-19/USA/CA-Stanford-08_S35/2021 EPI_ISL_1424105 2021-01-31<br>>hCoV-19/USA/CA-Stanford-08_S44/2021 EPI_ISL_1379882 2021-01-28<br>>hCoV-19/USA/CA-Stanford-13_S41/2021 EPI_ISL_2027147 2021-01-19<br>>hCoV-19/USA/CA-Stanford-18_S44/2021 EPI_ISL_2027225 2021-01-21<br>>hCoV-19/USA/CA-Stanford-18_S45/2021 EPI_ISL_2027228 2021-01-21<br>>hCoV-19/USA/CA-Stanford-18_S46/2021 EPI_ISL_2027140 2021-01-24                                                                                                                                       |
| L452, E484K, N501 | >hCoV-19/USA/CA-Stanford-02_S40/2021 EPI_ISL_1364498 2021-01-13<br>>hCoV-19/USA/CA-Stanford-04_S01/2021 EPI_ISL_1364506 2021-01-23<br>>hCoV-19/USA/CA-Stanford-06_S07/2021 EPI_ISL_1364507 2021-01-29<br>>hCoV-19/USA/CA-Stanford-07_S13/2020 EPI_ISL_1364508 2020-12-31<br>>hCoV-19/USA/CA-Stanford-07_S17/2021 EPI_ISL_1364509 2021-01-19<br>>hCoV-19/USA/CA-Stanford-07_S18/2021 EPI_ISL_1364510 2021-01-19<br>>hCoV-19/USA/CA-Stanford-07_S21/2021 EPI_ISL_1364513 2021-02-01<br>>hCoV-19/USA/CA-Stanford-07_S22/2021 EPI_ISL_1364514 2021-02-01<br>>hCoV-19/USA/CA-Stanford-07_S23/2021 EPI_ISL_1364515 2021-01-20<br>>hCoV-19/USA/CA-Stanford-09_S01/2021 EPI_ISL_1364516 2021-01-27<br>>hCoV-19/USA/CA-Stanford-09_S07/2021 EPI_ISL_1364520 2021-01-22<br>>hCoV-19/USA/CA-Stanford-09_S10/2021 EPI_ISL_1364523 2021-02-11<br>>hCoV-19/USA/CA-Stanford-11_S06/2021 EPI_ISL_2027150 2021-02-09<br>>hCoV-19/USA/CA-Stanford-12_S41/2021 EPI_ISL_2027167 2021-02-28 |
| L452, E484, N501Y | >hCoV-19/USA/CA-Stanford-03_S44/2021 EPI_ISL_1364502 2021-01-15<br>>hCoV-19/USA/CA-Stanford-03_S46/2021 EPI_ISL_1364504 2021-01-15<br>>hCoV-19/USA/CA-Stanford-03_S47/2021 EPI_ISL_1364505 2021-01-18<br>>hCoV-19/USA/CA-Stanford-04_S22/2021 EPI_ISL_2009049 2021-01-19<br>>hCoV-19/USA/CA-Stanford-07_S20/2021 EPI_ISL_1364512 2021-01-19<br>>hCoV-19/USA/CA-Stanford-09_S02/2021 EPI_ISL_1364517 2021-02-05<br>>hCoV-19/USA/CA-Stanford-09_S03/2021 EPI_ISL_1364518 2021-01-26<br>>hCoV-19/USA/CA-Stanford-09_S08/2021 EPI_ISL_1364521 2021-02-09<br>>hCoV-19/USA/CA-Stanford-09_S09/2021 EPI_ISL_1364522 2021-02-11<br>>hCoV-19/USA/CA-Stanford-10_S09/2021 EPI_ISL_1424116 2021-02-24<br>>hCoV-19/USA/CA-Stanford-10_S10/2021 EPI_ISL_1424117 2021-02-24                                                                                                                                                                                                          |

|                    |                                                                                                                                                                                                                                                                                                                                                                                                                                                                                                                                                                                                                                                                                                                                                               |
|--------------------|---------------------------------------------------------------------------------------------------------------------------------------------------------------------------------------------------------------------------------------------------------------------------------------------------------------------------------------------------------------------------------------------------------------------------------------------------------------------------------------------------------------------------------------------------------------------------------------------------------------------------------------------------------------------------------------------------------------------------------------------------------------|
|                    | >hCoV-19/USA/CA-Stanford-10_S11/2021 EPI_ISL_1424118 2021-02-19<br>>hCoV-19/USA/CA-Stanford-10_S12/2021 EPI_ISL_1424119 2021-02-21<br>>hCoV-19/USA/CA-Stanford-10_S13/2021 EPI_ISL_1424120 2021-02-22<br>>hCoV-19/USA/CA-Stanford-10_S14/2021 EPI_ISL_1424121 2021-02-18<br>>hCoV-19/USA/CA-Stanford-10_S15/2021 EPI_ISL_1424122 2021-02-19<br>>hCoV-19/USA/CA-Stanford-10_S16/2021 EPI_ISL_1424123 2021-02-19<br>>hCoV-19/USA/CA-Stanford-10_S19/2021 EPI_ISL_1424124 2021-02-12<br>>hCoV-19/USA/CA-Stanford-10_S21/2021 EPI_ISL_1424125 2021-02-26<br>>hCoV-19/USA/CA-Stanford-12_S37/2021 EPI_ISL_2027133 2021-02-28<br>>hCoV-19/USA/CA-Stanford-12_S38/2021 EPI_ISL_2027138 2021-03-03<br>>hCoV-19/USA/CA-Stanford-12_S46/2021 EPI_ISL_2027136 2021-03-07 |
| L452, E484K, N501Y | >hCoV-19/USA/CA-05_S19_JAN/2021 EPI_ISL_1335872 2021-01-06<br>>hCoV-19/USA/CA-07_S15_JAN/2021 EPI_ISL_1335871 2021-01-19<br>>hCoV-19/USA/CA-Stanford-07_S10/2021 EPI_ISL_1424066 2021-01-27                                                                                                                                                                                                                                                                                                                                                                                                                                                                                                                                                                   |

161
